# Supplementary material for: Impact of encapsulating a probiotic (Pediococcus pentosaceus Li05) within gastro-responsive microgels on Clostridium difficile infections
Source: Royal Society of Chemistry journal article supplement (doi:10.1039/d0fo03235b), 2021-01-01
Supplement: d0fo03235b1.pdf [file d0fo03235b1.pdf]

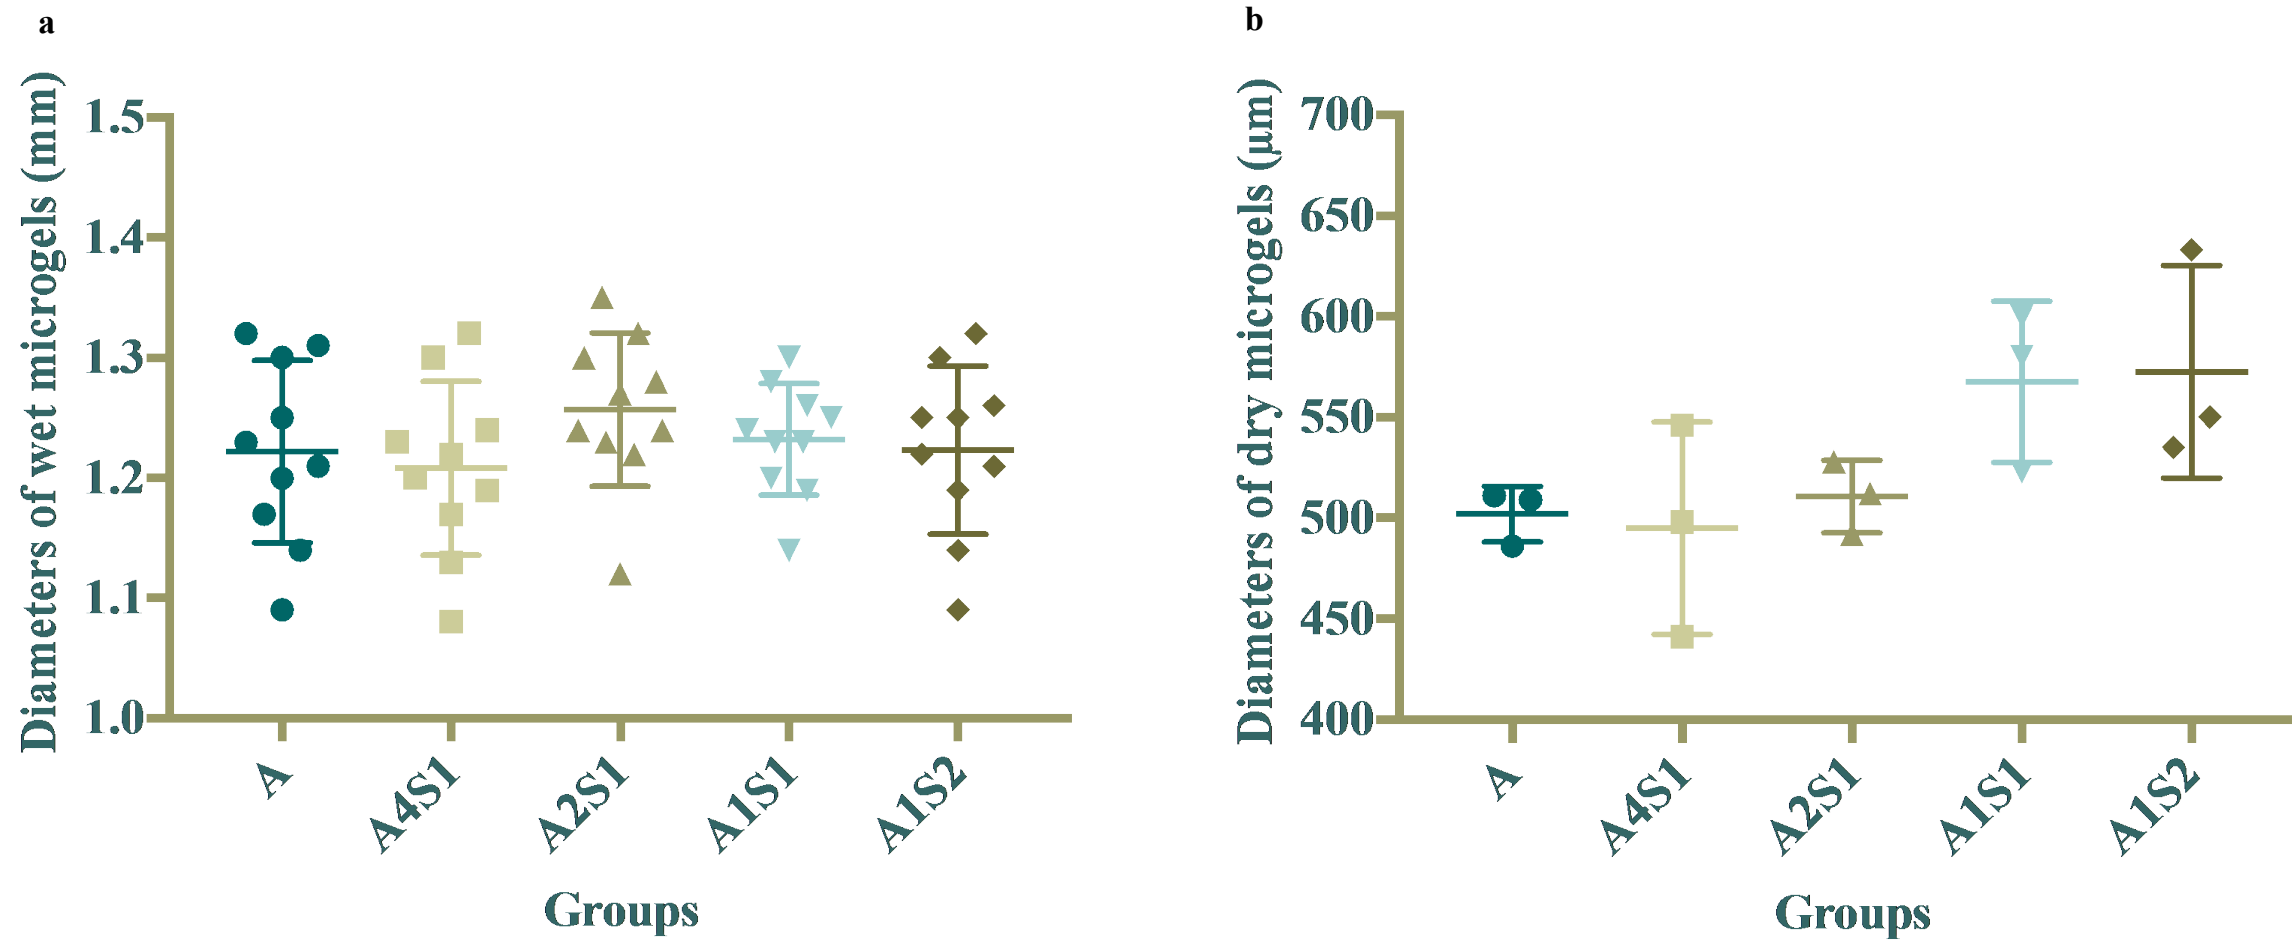

Fig. S1. Diameters of microgels. a. Diameters of wet microgels by optical microscope. b. Diameters of dry microgels by SEM.

Fig.S2.

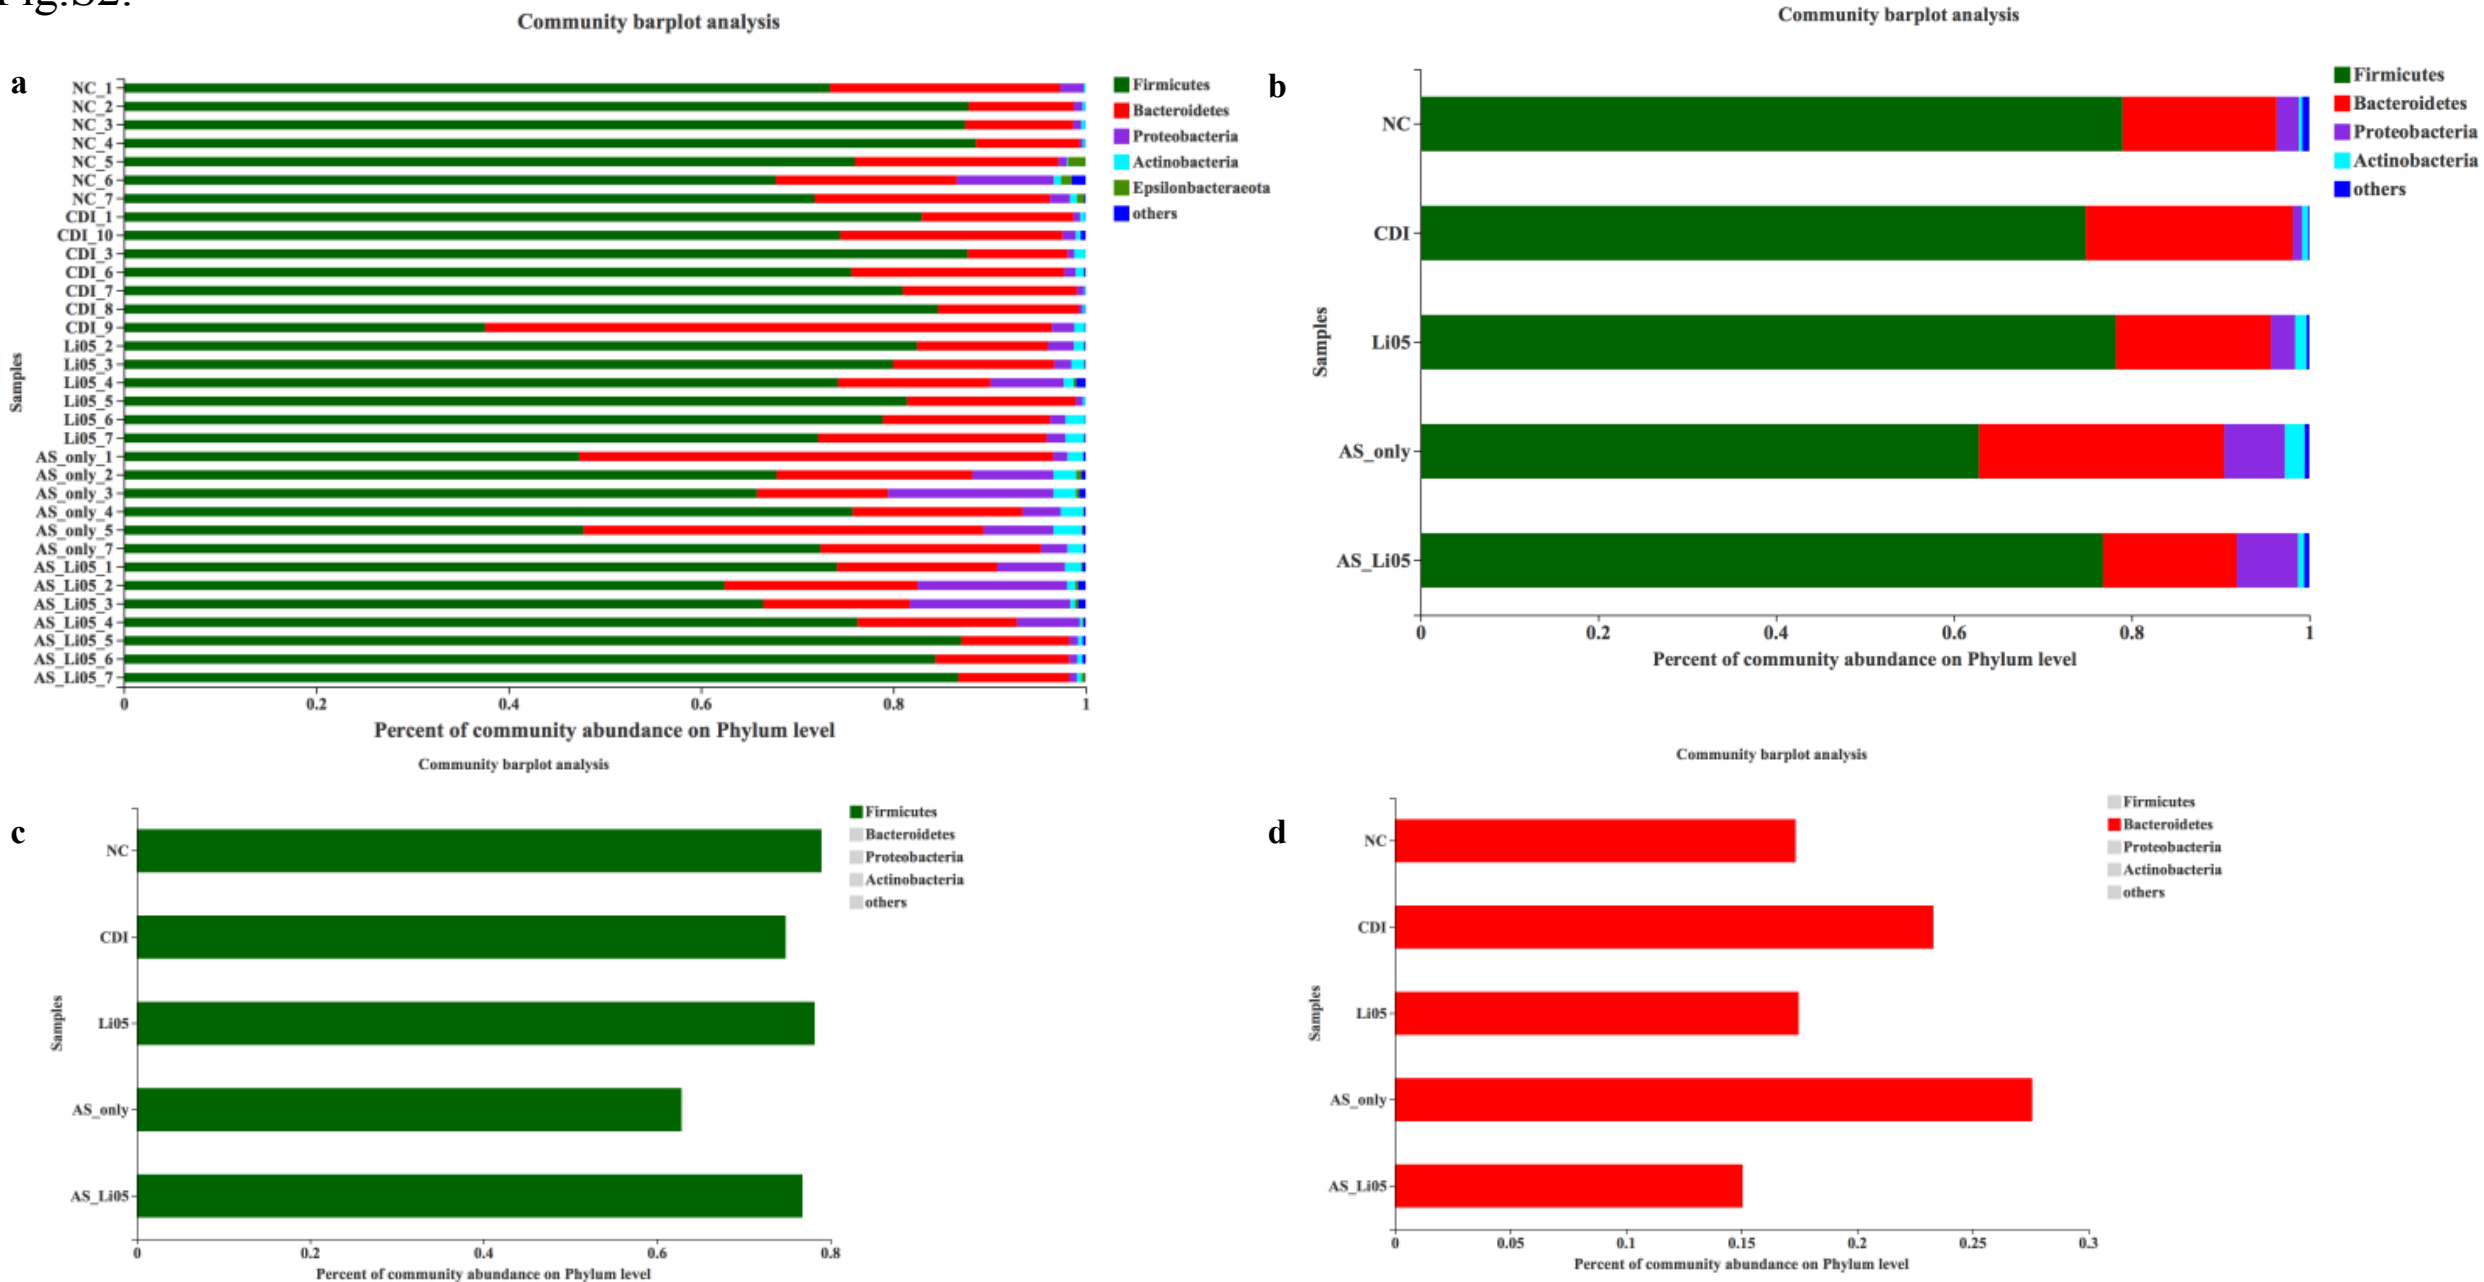

**Fig. S2. Relative taxa abundance on phylum level. Different color indicated different phylum. a. Community barplot analysis of all samples. b. Mean values of five groups. c. Percentage of *Firmicutes* in five groups. d. Percentage of *Bacteroidetes* in five groups.**

Fig.S3.

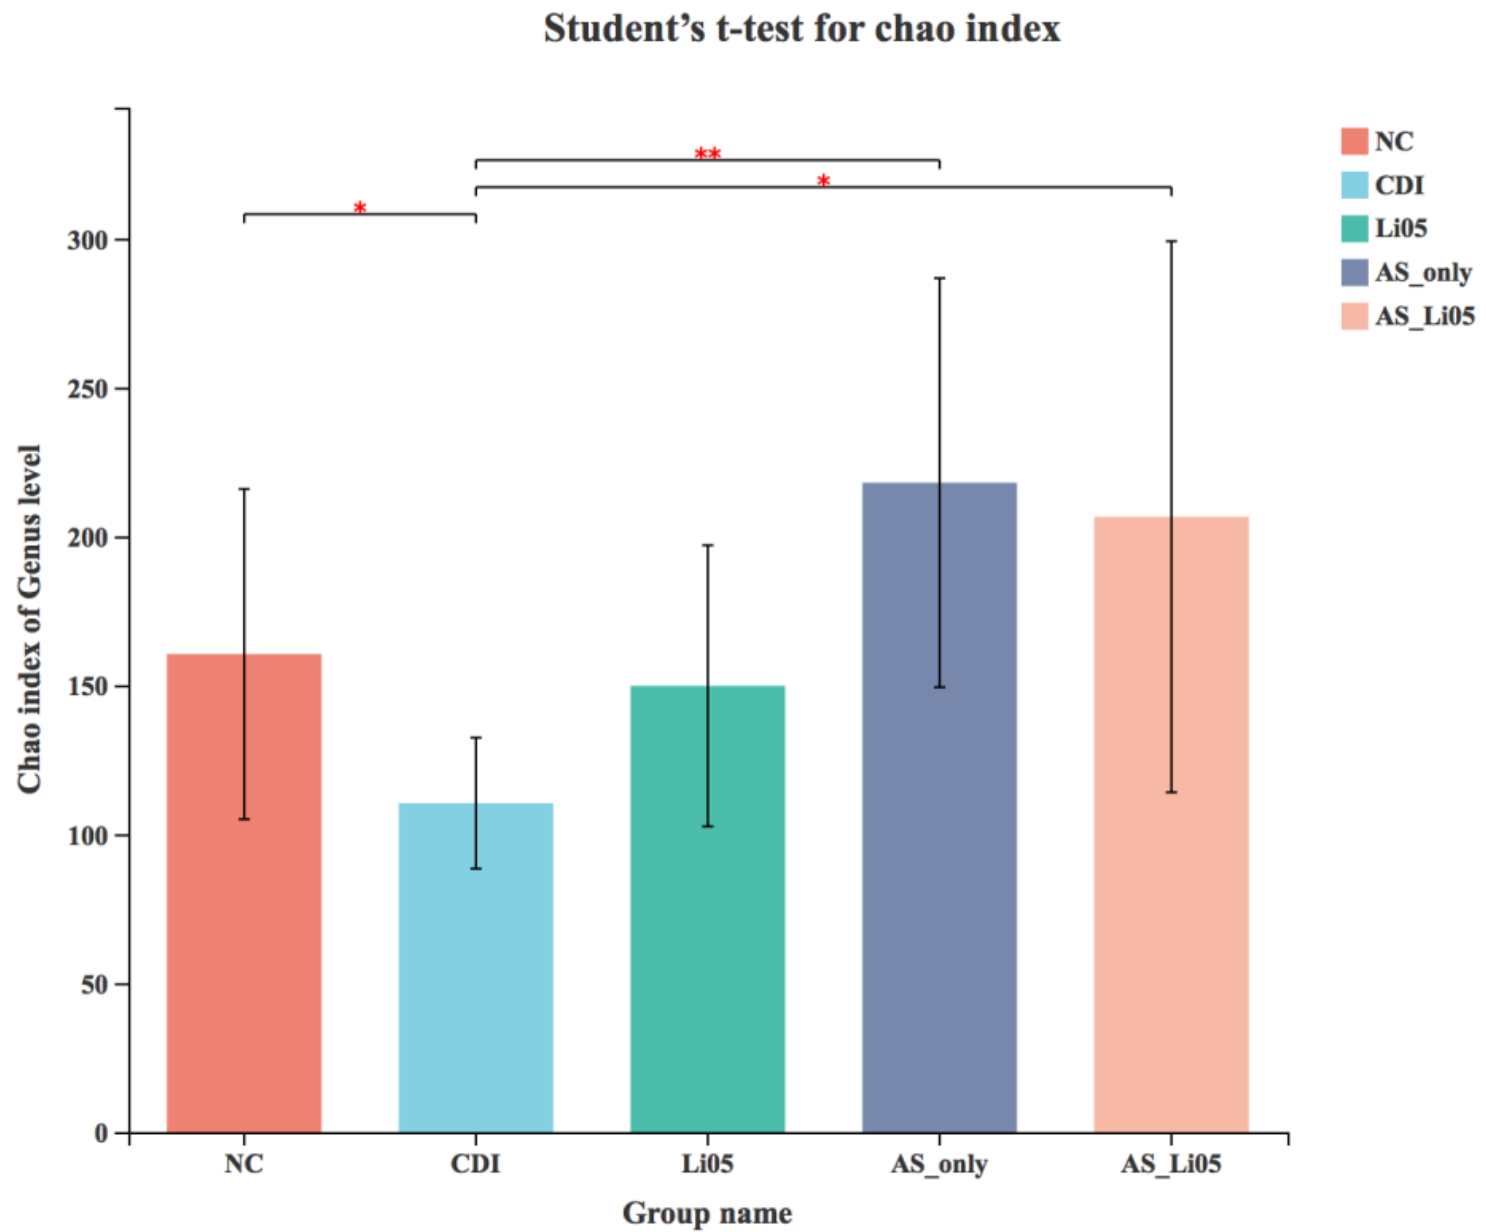

Fig. S3. Mean chao index of genus level. \* $p < 0.05$ , \*\* $p < 0.01$ .
